# Supplementary material
Source: Elsevier journal article supplement (http://library.osu.edu/projects/msa/suppmat/v249.i2.pp100-112/mmc1.pdf)
Supplement: mmc1 [file mmc1.pdf]

**Table 1S.** Assignments of the LIF spectrum of anthranilic acid and comparison with the REMPI results measured by Wu et al.[9]. Frequency of the electronic origin  $\nu_{00} = 28591 \text{ cm}^{-1}$  was subtracted from the LIF frequencies. All frequencies are given in  $\text{cm}^{-1}$ .

| $\nu - \nu_{00}$ | $I/I_{00}$ [%] | FWHM        | assignment                              | $\Sigma \nu_{\text{fund}}$ | $\Delta \nu$ | classification                                                      | REMPI, Wu et al. [9]                                                            |
|------------------|----------------|-------------|-----------------------------------------|----------------------------|--------------|---------------------------------------------------------------------|---------------------------------------------------------------------------------|
| <b>0.0</b>       | <b>100</b>     | <b>1.63</b> | <b>00</b>                               | <b>0.0</b>                 | <b>0.0</b>   |                                                                     |                                                                                 |
| 97.0             | 2              | 1.45        | dimer                                   | 97.0                       | 0.0          |                                                                     |                                                                                 |
| 153.8            | 1              | 1.09        | dimer                                   | 154.0                      | 0.2          |                                                                     |                                                                                 |
| 156.3            | 1              | 2.33        |                                         |                            |              |                                                                     |                                                                                 |
| <b>161.5</b>     | <b>3</b>       | <b>1.57</b> | <b><math>2 \times \nu_{1A}</math></b>   | <b>161.5</b>               | <b>0.0</b>   | $10b_0^2 \gamma(\text{ring})$                                       |                                                                                 |
| <b>219.0</b>     | <b>2</b>       | <b>1.57</b> | <b><math>2 \times \nu_{2A}</math></b>   | <b>219.0</b>               | <b>0.0</b>   | $\gamma(-\text{COOH})_0^2$ torsion                                  | $220 = A_0^2 \gamma(-\text{COOH})$ torsion                                      |
| 222.4            | 2              | 3.22        |                                         |                            |              |                                                                     |                                                                                 |
| 239.4            | 1              | 3.30        |                                         |                            |              |                                                                     |                                                                                 |
| <b>253.1</b>     | <b>89</b>      | <b>1.60</b> | <b><math>\nu_{1S}</math></b>            | <b>253.1</b>               | <b>0.0</b>   | $\beta(-\text{COOH})$                                               | $254 = B_0^1 \beta(-\text{COOH})$                                               |
| 255.9            | 4              | 2.13        | dimer                                   |                            |              |                                                                     |                                                                                 |
| 310.2            | 2              | 1.26        | dimer                                   | 313.7                      | 3.5          |                                                                     |                                                                                 |
| <b>354.5</b>     | <b>36</b>      | <b>1.47</b> | <b><math>\nu_{2S}</math></b>            | <b>354.5</b>               | <b>0.0</b>   | $\beta(-\text{NH}_2)$                                               | $355 = C_0^1 \beta(-\text{NH}_2)$                                               |
| <b>379.4</b>     | <b>13</b>      | <b>1.45</b> | <b><math>2 \times \nu_{3A}</math></b>   | <b>379.4</b>               | <b>0.0</b>   | $10a_0^2 \gamma(\text{ring})$                                       | $379 = 10b_0^2 \gamma(\text{ring})$                                             |
| 386.6            | 1              | 1.14        | dimer                                   | 386.7                      | 0.2          |                                                                     |                                                                                 |
| 400.7            | 3              | 2.34        | dimer                                   | 397.9                      | -2.8         |                                                                     |                                                                                 |
| 409.2            | 5              | 2.23        | $\nu_{1S} + 2 \times \nu_{1A}$          | 414.6                      | 5.4          |                                                                     |                                                                                 |
| <b>418.4</b>     | <b>102</b>     | <b>1.57</b> | <b><math>\nu_{3S}</math></b>            | <b>418.4</b>               | <b>0.0</b>   | $\beta(-\text{COOH}),$<br>$\beta(-\text{NH}_2), \beta(\text{ring})$ | $418 = D_0^1 \beta(-\text{COOH}),$<br>$\beta(-\text{NH}_2), \beta(\text{ring})$ |
| 441.8            | 2              | 1.40        | dimer                                   | 443.7                      | 1.9          |                                                                     |                                                                                 |
| 443.9            | 1              | 1.32        | dimer                                   |                            |              |                                                                     |                                                                                 |
| 456.1            | 2              | 1.68        | dimer                                   | 454.9                      | -1.2         |                                                                     |                                                                                 |
| 471.3            | 3              | 1.25        | $\nu_{1S} + 2 \times \nu_{2A}$          | 472.1                      | 0.8          |                                                                     |                                                                                 |
| 498.3            | 2              | 1.72        |                                         | 500.7                      | 2.4          |                                                                     |                                                                                 |
| <b>501.7</b>     | <b>13</b>      | <b>1.40</b> | <b><math>\nu_{4S}</math></b>            | <b>501.7</b>               | <b>0.0</b>   | $9b, \beta(-\text{COOH}) \beta(-\text{NH}_2),$                      |                                                                                 |
| 507.4            | 60             | 1.52        | $2 \times \nu_{1S}$                     | 506.2                      | -1.2         |                                                                     | $506 = B_0^2$                                                                   |
| 514.6            | 1              | 1.51        | dimer                                   | 511.9                      | -2.7         |                                                                     |                                                                                 |
| 538.8            | 4              | 3.41        | dimer                                   | 539.1                      | 0.3          |                                                                     |                                                                                 |
| <b>542.9</b>     | <b>22</b>      | <b>1.47</b> | <b><math>\nu_{5S}</math></b>            | <b>542.9</b>               | <b>0.0</b>   | $6a \beta(\text{ring})$                                             | $544 = 6a_0^1 \beta(\text{ring})$                                               |
| 545.5            | 2              | 1.42        |                                         |                            |              |                                                                     |                                                                                 |
| 562.3            | 3              | 1.56        |                                         |                            |              |                                                                     |                                                                                 |
| 573.3            | 1              | 1.69        | $\nu_{2S} + 2 \times \nu_{2A}$          | 573.5                      | 0.2          |                                                                     |                                                                                 |
| 582.7            | 4              | 1.38        | $\nu_{3S} + 2 \times \nu_{1A}$          | 579.9                      | -3.8         |                                                                     |                                                                                 |
| <b>594.6</b>     | <b>34</b>      | <b>1.53</b> | <b><math>\nu_{6S}</math></b>            | <b>594.6</b>               | <b>0.0</b>   | $6b \beta(\text{ring}), \beta(\text{C=O})$                          | $595 = A_0^2 10b_0^2$ (*) <i>too large intensity for this combination</i>       |
| 602.7            | 18             | 1.44        | $\nu_{1S} + \nu_{2S}$                   | 607.6                      | 4.9          | <i>anharmonicity</i>                                                | $602 = B_0^1 C_0^1$<br>or $16b_0^2 \gamma(\text{ring})$                         |
| <b>609.2</b>     | <b>2</b>       | <b>1.35</b> | <b><math>2 \times \nu_{4A}</math></b>   | <b>609.2</b>               | <b>0.0</b>   | $16b_0^2 \gamma(\text{ring})$                                       |                                                                                 |
| 631.8            | 12             | 1.67        | $\nu_{1S} + 2 \times \nu_{3A}$          | 632.5                      | 0.7          |                                                                     | $632 = 6b_0^1 \beta(\text{ring})$ (*)                                           |
| 636.9            | 2              | 1.68        | $\nu_{3S} + 2 \times \nu_{2A}$          | 637.4                      | 0.5          |                                                                     |                                                                                 |
| 653.9            | 1              | 1.38        | dimer                                   | 653.1                      | -0.8         |                                                                     |                                                                                 |
| 661.5            | 3              | 1.29        | $2 \times \nu_{1S} + 2 \times \nu_{1A}$ | 667.7                      | 6.2          |                                                                     |                                                                                 |
| 666.6            | 2              | 1.72        |                                         |                            |              |                                                                     |                                                                                 |
| 670.9            | 87             | 1.61        | $\nu_{1S} + \nu_{3S}$                   | 671.6                      | 0.7          |                                                                     | $672 = B_0^1 D_0^1$                                                             |
| 701.5            | 2              | 2.04        | dimer                                   | 698.8                      | -2.7         |                                                                     |                                                                                 |
| 706.8            | 5              | 1.53        | $2 \times \nu_{2S}$                     | 709.0                      | 2.2          |                                                                     |                                                                                 |
| <b>713.1</b>     | <b>31</b>      | <b>1.47</b> | <b><math>\nu_{7S}</math></b>            | <b>713.1</b>               | <b>0.0</b>   | $\beta(\text{O-C=O}),$<br>$1 \nu(\text{ring})$                      | $713 = C_0^2$ (*) <i>too large intensity for this overtone</i>                  |
| 728.4            | 3              | 1.52        | $2 \times \nu_{1S} + 2 \times \nu_{2A}$ | 725.2                      | -3.2         |                                                                     |                                                                                 |

| $\nu - \nu_{00}$ | $I/I_{00}$ [%] | FWHM        | assignment                        | $\Sigma \nu_{\text{fund}}$ | $\Delta \nu$ | classification                                                              | REMPLI, Wu et al. [9]                                                                                                     |
|------------------|----------------|-------------|-----------------------------------|----------------------------|--------------|-----------------------------------------------------------------------------|---------------------------------------------------------------------------------------------------------------------------|
| 732.3            | 2              | 1.15        | $\nu_{2S}+2\nu_{3A}$              | 733.9                      | 1.6          |                                                                             |                                                                                                                           |
| 753.1            | 8              | 2.42        | $\nu_{1S}+\nu_{4S}$               | 754.8                      | 1.7          |                                                                             |                                                                                                                           |
| 761.5            | 34             | 1.42        | $3\nu_{1S}$                       | 759.4                      | -2.1         |                                                                             | $762 = B_0^3$                                                                                                             |
| 764.9            | 2              | 2.00        | $\nu_{1S}+\nu_{2S}+2\nu_{1A}$     | 763.7                      | -1.2         |                                                                             |                                                                                                                           |
| 772.5            | 32             | 1.33        | $\nu_{2S}+\nu_{3S}$               | 772.9                      | 0.4          |                                                                             | $772 = C_0^1 D_0^1$                                                                                                       |
| 783.3            | 1              | 1.00        |                                   |                            |              |                                                                             |                                                                                                                           |
| 795.8            | 21             | 1.44        | $\nu_{1S}+\nu_{5S}$               | 796.0                      | 0.2          |                                                                             | $797 = B_0^1 6a_0^1$                                                                                                      |
| 799.5            | 22             | 1.74        | $\nu_{3S}+2\nu_{3A}$              | 797.8                      | -1.7         |                                                                             |                                                                                                                           |
| 820.6            | 3              | 2.42        | $\nu_{1S} + \nu_{2S} + 2\nu_{2A}$ | 826.6                      | 6.0          |                                                                             |                                                                                                                           |
| 827.3            | 8              | 1.82        | $\nu_{1S}+\nu_{3S}+2\nu_{1A}$     | 833.0                      | 5.7          |                                                                             |                                                                                                                           |
| 835.0            | 56             | 1.67        | $2\nu_{3S}$                       | 836.9                      | 1.9          |                                                                             | <i>overlapping</i>                                                                                                        |
| <b>839.1</b>     | <b>40</b>      | <b>1.54</b> | <b><math>2\nu_{5A}</math></b>     | <b>839.1</b>               | <b>0.0</b>   | $16a_0^2 \gamma(\text{ring})$                                               | $839 = D_0^2$                                                                                                             |
| <b>840.9</b>     | <b>35</b>      | <b>1.35</b> | <b><math>\nu_{8S}</math></b>      | <b>840.9</b>               | <b>0.0</b>   | 12 $\beta(\text{ring})$                                                     | <i>overlapping</i>                                                                                                        |
| 846.5            | 23             | 1.34        | $\nu_{1S}+\nu_{6S}$               | 847.7                      | 1.2          |                                                                             |                                                                                                                           |
| 853.7            | 3              | 1.04        | $2\nu_{1S}+\nu_{2S}$              | 860.7                      | 7.0          |                                                                             |                                                                                                                           |
| 857.2            | 2              | 1.03        | $\nu_{4S}+\nu_{2S}$               | 856.2                      | -1.0         |                                                                             |                                                                                                                           |
| 860.5            | 1              | 1.59        | $2\nu_{1S}+\nu_{2S}$              | 860.7                      | 0.2          |                                                                             |                                                                                                                           |
| 864.5            | 2              | 1.62        | $\nu_{1S}+2\nu_{4A}$              | 862.3                      | -2.2         |                                                                             |                                                                                                                           |
| 879.6            | 2              | 1.05        | $\nu_{4S}+2\nu_{3A}$              | 881.1                      | 1.4          |                                                                             |                                                                                                                           |
| 882.2            | 4              | 2.36        | <b>dimer</b>                      |                            |              |                                                                             |                                                                                                                           |
| 885.5            | 6              | 2.07        | $2\nu_{1S}+2\nu_{3A}$             | 885.6                      | 0.1          |                                                                             | $884 = 19a_0^1 \beta(\text{ring}) (*)$                                                                                    |
| 888.7            | 2              | 1.65        | $\nu_{1S}+ \nu_{3S}+2\nu_{2A}$    | 890.5                      | 1.8          |                                                                             |                                                                                                                           |
| 897.8            | 13             | 2.72        | $\nu_{2S}+\nu_{5S}$               | 897.4                      | -0.4         |                                                                             |                                                                                                                           |
| 919.7            | 10             | 1.31        | $\nu_{3S}+\nu_{4S}$               | 920.1                      | 0.4          |                                                                             |                                                                                                                           |
| 921.6            | 4              | 1.34        | $\nu_{5S}+2\nu_{3A}$              | 922.3                      | 0.6          |                                                                             |                                                                                                                           |
| 924.7            | 53             | 1.27        | $2\nu_{1S}+\nu_{3S}$              | 924.7                      | 0.0          |                                                                             | $923 = B_0^2 D_0^1$                                                                                                       |
| 945.3            | 4              | 1.23        |                                   |                            |              |                                                                             |                                                                                                                           |
| 947.9            | 7              | 2.06        | $\nu_{2S}+\nu_{6S}$               | 949.1                      | 1.2          |                                                                             |                                                                                                                           |
| 953.1            | 3              | 2.53        | $\nu_{1S}+\nu_{5S}+2\nu_{1A}$     | 957.4                      | 4.3          |                                                                             |                                                                                                                           |
|                  |                |             | $2\nu_{2S}+ \nu_{1S}$             | 962.1                      | 9.0          | <i>anharmonicity</i>                                                        |                                                                                                                           |
| 960.7            | 26             | 1.26        | $\nu_{3S}+\nu_{5S}$               | 961.3                      | 0.6          |                                                                             | $961 = B_0^1 C_0^2 (*)$ <i>overlapping,</i><br><i>too large intensity</i><br><i>overlapping</i>                           |
| 966.5            | 29             | 1.23        | $\nu_{1S}+\nu_{7S}$               | 966.2                      | -0.3         |                                                                             |                                                                                                                           |
| 977.9            | 1              | 2.97        | <b>dimer</b>                      | 981.2                      | 3.3          |                                                                             |                                                                                                                           |
| 986.7            | 2              | 0.98        | $\nu_{1S}+\nu_{2S}+2\nu_{3A}$     | 987.0                      | 0.3          |                                                                             | $988 = C_0^1 6b_0^1 (*)$                                                                                                  |
| 1005.0           | 4              | 1.52        | $2\nu_{1S}+\nu_{4S}$              | 1007.9                     | 2.9          |                                                                             |                                                                                                                           |
| 1012.5           | 28             | 1.38        | $\nu_{3S}+\nu_{6S}$               | 1013.0                     | 0.5          |                                                                             | $1013 = B_0^4 (*)$ <i>overlapping</i><br><i>too large intensity for this</i><br><i>combination</i><br><i>overlapping,</i> |
| 1016.5           | 10             | 1.08        | $4\nu_{1S}$                       | 1012.5                     | -4.0         | <i>anharmonicity</i>                                                        |                                                                                                                           |
| 1020.5           | 12             | 1.72        | $\nu_{3S}+\nu_{1S}+\nu_{2S}$      | 1026.1                     | 5.5          |                                                                             |                                                                                                                           |
| 1050.5           | 16             | 2.00        | $2\nu_{1S}+\nu_{5S}$              | 1049.1                     | -1.4         |                                                                             | $1050 = C_0^3 (*)$ <i>too large</i><br><i>intensity,</i><br><i>discrepancy <math>\Delta \nu = 16\text{cm}^{-1}</math></i> |
|                  |                |             | $\nu_{1S}+\nu_{3S}+2\nu_{3A}$     | 1051.0                     | 0.5          |                                                                             |                                                                                                                           |
| 1060.5           | 3              | 1.41        | $3\nu_{2S}$                       | 1063.5                     | 3.0          |                                                                             |                                                                                                                           |
| 1067.7           | 2              | 1.26        | $\nu_{2S}+\nu_{7S}$               | 1067.5                     | -0.1         |                                                                             |                                                                                                                           |
| 1079.6           | 2              | 1.24        | $2\nu_{1S}+\nu_{3S}+2\nu_{1A}$    | 1086.1                     | 6.5          |                                                                             |                                                                                                                           |
| 1087.0           | 30             | 1.60        | $\nu_{1S}+2\nu_{3S}$              | 1090.0                     | 3.0          |                                                                             | <i>overlapping</i>                                                                                                        |
| 1091.6           | 25             | 1.37        | $\nu_{1S}+2\nu_{5A}$              | 1092.2                     | 0.6          |                                                                             | $1092 = B_0^1 D_0^2 (*)$                                                                                                  |
| 1094.2           | 34             | 2.11        | $\nu_{1S}+\nu_{8S}$               | 1094.1                     | -0.2         |                                                                             | <i>overlapping</i>                                                                                                        |
| 1100.4           | 8              | 1.28        | $2\nu_{1S}+\nu_{6S}$              | 1100.8                     | 0.4          |                                                                             |                                                                                                                           |
| 1109.2           | 2              | 2.56        | $\nu_{1S}+\nu_{2S}+\nu_{4S}$      | 1109.3                     | 0.1          |                                                                             |                                                                                                                           |
| <b>1118.9</b>    | <b>7</b>       | <b>1.66</b> | <b><math>\nu_{11S}</math></b>     | <b>1118.9</b>              | <b>0.0</b>   | $\beta_{\text{as}}(\text{NH}_2), \nu(\text{C-OH}),$<br>$\beta(\text{ring})$ |                                                                                                                           |

| $\nu - \nu_{00}$ | $I/I_{00}$ [%] | FWHM        | assignment                                 | $\Sigma \nu_{\text{fund}}$ | $\Delta \nu$ | classification                               | REMPL, Wu et al. [9]                                              |
|------------------|----------------|-------------|--------------------------------------------|----------------------------|--------------|----------------------------------------------|-------------------------------------------------------------------|
| 1125.0           | 4              | 1.50        | $\nu_{3S}+2\times\nu_{2S}$                 | 1127.4                     | 2.4          |                                              |                                                                   |
| 1130.9           | 31             | 1.20        | $\nu_{3S}+\nu_{7S}$                        | 1131.5                     | 0.6          |                                              | $1130 = C_0^2 D_0^1 (*)$ too large intensity for this combination |
| 1136.8           | 3              | 2.15        | $\nu_{5S}+\nu_{6S}$                        | 1137.4                     | 0.6          |                                              |                                                                   |
| 1141.8           | 13             | 2.17        | $\nu_{5S}+\nu_{6S}$                        | 1137.5                     | -4.3         |                                              | $1140 = B_0^2 6b_0^1 (*)$                                         |
|                  |                |             | $3\times\nu_{1S}+2\times\nu_{3A}$          | 1138.8                     | -3.1         |                                              |                                                                   |
| 1145.3           | 5              | 1.95        | $\nu_{5S}+\nu_{1S}+\nu_{2S}$               | 1150.5                     | 5.2          |                                              |                                                                   |
| 1167.8           | 2              | 1.23        | $4\times\nu_{1S}+2\times\nu_{1A}$          | 1173.9                     | 6.1          |                                              |                                                                   |
| 1170.9           | 5              | 1.67        | $\nu_{1S}+\nu_{3S}+\nu_{4S}$               | 1173.2                     | 2.4          |                                              |                                                                   |
| 1174.6           | 8              | 2.21        | $\nu_{1S}+\nu_{5S}+2\times\nu_{3A}$        | 1175.4                     | 0.8          |                                              |                                                                   |
| 1178.6           | 26             | 1.59        | $3\times\nu_{1S}+\nu_{3S}$                 | 1177.8                     | -0.8         |                                              | $1178 = 6a_0^1 6b_0^1 (*)$                                        |
| 1188.9           | 5              | 1.63        | $2\times\nu_{6S}$                          | 1189.1                     | 0.3          |                                              |                                                                   |
|                  |                |             | $2\times\nu_{3S}+\nu_{2S}$                 | 1191.4                     | 2.5          |                                              |                                                                   |
| 1192.7           | 10             | 1.40        | $2\times\nu_{3S}+\nu_{2S}$                 | 1191.4                     | -1.3         |                                              |                                                                   |
|                  |                |             | $\nu_{2S}+2\times\nu_{5A}$                 | 1193.6                     | 0.9          |                                              |                                                                   |
| 1194.7           | 7              | 1.19        | $\nu_{2S}+\nu_{8S}$                        | 1195.4                     | 0.7          |                                              |                                                                   |
|                  |                |             | $\nu_{6S}+\nu_{1S}+\nu_{2S}$               | 1202.2                     | 7.5          |                                              |                                                                   |
| 1199.7           | 10             | 1.59        | $\nu_{1S}+\nu_{2S}+\nu_{6S}$               | 1202.2                     | 2.5          |                                              |                                                                   |
| 1206.5           | 13             | 1.66        | $2\times\nu_{1S}+2\times\nu_{2S}$          | 1205.4                     | -1.1         |                                              |                                                                   |
| 1213.6           | 19             | 1.61        | $\nu_{1S}+\nu_{3S}+\nu_{5S}$               | 1214.4                     | 0.8          |                                              |                                                                   |
| 1220.9           | 30             | 2.26        | $2\times\nu_{1S}+\nu_{7S}$                 | 1219.3                     | -1.5         |                                              | $1218 = B_0^2 C_0^2 (*)$ too large intensity for this combination |
| <b>1229.9</b>    | <b>10</b>      | <b>1.59</b> | <b><math>\nu_{1SS}</math></b>              | <b>1229.9</b>              | <b>0.0</b>   | $\beta(\text{O-H}),$<br>$\nu(\text{C-COOH})$ |                                                                   |
| 1233.7           | 3              | 1.58        | $2\times\nu_{1S}+\nu_{2S}+2\times\nu_{3A}$ | 1241.1                     | 6.5          |                                              |                                                                   |
|                  |                |             | $\nu_{2S}+2\times\nu_{3A}+\nu_{4S}$        | 1235.6                     | 1.9          |                                              |                                                                   |
| 1239.5           | 9              | 1.49        | $2\times\nu_{1S}+\nu_{2S}+2\times\nu_{3A}$ | 1240.1                     | 0.6          |                                              |                                                                   |
| 1250.7           | 12             | 1.95        | $3\times\nu_{3S}$                          | 1255.3                     | 4.6          | <i>anharmonicity</i>                         | <i>overlapping</i>                                                |
| 1257.8           | 30             | 1.72        | $\nu_{3S}+2\times\nu_{5A}$                 | 1257.6                     | -0.2         |                                              | $1258 = D_0^3 (*)$                                                |
|                  |                |             | $\nu_{5S}+\nu_{7S}$                        | 1255.9                     | -1.8         |                                              | <i>overlapping</i>                                                |
| 1260.0           | 19             | 1.31        | $\nu_{3S}+\nu_{8S}$                        | 1259.4                     | -0.6         |                                              | <i>overlapping</i>                                                |
| 1264.1           | 22             | 1.63        | $\nu_{1S}+\nu_{3S}+\nu_{6S}$               | 1266.1                     | 2.0          |                                              | <i>overlapping</i>                                                |
| 1271.5           | 4              | 1.32        | $5\times\nu_{1S}$                          | 1265.6                     | -5.9         |                                              |                                                                   |
| 1274.3           | 9              | 3.13        | $2\times\nu_{1S}+\nu_{3S}+\nu_{2S}$        | 1279.1                     | 4.9          |                                              |                                                                   |
| 1277.9           | 3              | 1.67        |                                            |                            |              |                                              |                                                                   |
| 1296.0           | 5              | 1.87        |                                            |                            |              |                                              |                                                                   |
| 1304.9           | 6              | 1.58        | $3\times\nu_{1S}+\nu_{5S}$                 | 1302.2                     | -2.6         |                                              |                                                                   |
| 1308.1           | 12             | 2.12        | $\nu_{6S}+\nu_{7S}$                        | 1307.7                     | -0.5         |                                              |                                                                   |
| 1317.2           | 14             | 3.94        | $\nu_{7S}+\nu_{1S}+\nu_{2S}$               | 1320.7                     | 3.5          |                                              |                                                                   |
|                  |                |             | $\nu_{2S}+\nu_{3S}+\nu_{5S}$               | 1315.8                     | -1.4         |                                              |                                                                   |
| 1334.3           | 15             | 2.08        | $\nu_{1S}+2\times\nu_{5S}$                 | 1338.8                     | 4.6          |                                              | <i>overlapping</i>                                                |
|                  |                |             | $2\times\nu_{3S}+\nu_{4S}$                 | 1338.6                     | 5.4          |                                              |                                                                   |
| 1340.9           | 35             | 3.02        | $2\times\nu_{1S}+2\times\nu_{3S}$          | 1343.1                     | 2.2          |                                              | $1342 = B_0^2 D_0^2$                                              |
|                  |                |             | $\nu_{3S}+\nu_{5S}+2\times\nu_{3A}$        | 1340.7                     | -0.2         |                                              | <i>overlapping</i>                                                |
| 1345.4           | 10             | 1.55        | $2\times\nu_{1S}+2\times\nu_{5A}$          | 1345.4                     | -0.0         |                                              | <i>overlapping</i>                                                |
| 1347.7           | 16             | 1.82        | $2\times\nu_{1S}+\nu_{8S}$                 | 1347.1                     | -0.5         |                                              | <i>overlapping</i>                                                |
| 1354.1           | 6              | 1.53        | $3\times\nu_{1S}+\nu_{6S}$                 | 1353.9                     | -0.1         |                                              |                                                                   |
| 1363.8           | 5              | 1.66        | $\nu_{2S}+\nu_{3S}+\nu_{6S}$               | 1367.5                     | 3.7          |                                              |                                                                   |
|                  |                |             | $4\times\nu_{1S}+\nu_{2S}$                 | 1367.0                     | 3.1          |                                              |                                                                   |
| 1365.6           | 4              | 1.30        | $\nu_{2S}+\nu_{3S}+\nu_{6S}$               | 1367.5                     | 1.9          |                                              |                                                                   |
| 1372.4           | 7              | 1.35        | $2\times\nu_{2S}+\nu_{3S}+\nu_{1S}$        | 1380.5                     | 8.2          |                                              |                                                                   |
| 1377.3           | 4              | 1.59        | $\nu_{1S}+2\times\nu_{2S}+\nu_{3S}$        | 1380.5                     | 3.2          |                                              |                                                                   |
| 1383.6           | 43             | 1.85        | $\nu_{1S}+\nu_{3S}+\nu_{7S}$               | 1384.6                     | 1.0          |                                              |                                                                   |
|                  |                |             | $2\times\nu_{3S}+\nu_{5S}$                 | 1379.7                     | -3.8         |                                              |                                                                   |
| 1389.0           | 4              | 1.51        | $\nu_{1S}+\nu_{5S}+\nu_{6S}$               | 1390.6                     | 1.6          |                                              |                                                                   |

| $\nu - \nu_{00}$ | $I/I_{00}$ [%] | FWHM        | assignment                                           | $\Sigma \nu_{\text{fund}}$ | $\Delta \nu$ | classification                                                                | REMPL, Wu et al. [9] |
|------------------|----------------|-------------|------------------------------------------------------|----------------------------|--------------|-------------------------------------------------------------------------------|----------------------|
| <b>1395.0</b>    | <b>33</b>      | <b>2.39</b> | <b><math>\nu_{17S}</math></b>                        | <b>1395.0</b>              | <b>0.0</b>   | $\beta(\text{O-H}), \beta(\text{N-H}),$<br>$\nu(\text{C-O}) \nu(\text{ring})$ |                      |
|                  |                |             | $\nu_{2S} + \nu_{5S} + \nu_{4S}$                     | 1399.0                     | 4.0          |                                                                               |                      |
| 1398.8           | 4              | 1.42        | $2 \times \nu_{1S} + \nu_{5S} + \nu_{2S}$            | 1403.6                     | 4.8          |                                                                               |                      |
|                  |                |             | $\nu_{3S} + \nu_{6S} + 2 \times \nu_{3A}$            | 1392.4                     | -6.4         |                                                                               |                      |
|                  |                |             | $\nu_{3S} + 2 \times \nu_{3A} + \nu_{1S} + \nu_{2S}$ | 1400.6                     | 1.8          |                                                                               |                      |
|                  |                |             | $4 \times \nu_{1S} + 2 \times \nu_{3A}$              | 1391.9                     | -8.1         |                                                                               |                      |
| 1404.5           | 14             | 1.44        | $2 \times \nu_{1S} + \nu_{2S} + \nu_{5S}$            | 1403.6                     | -0.9         |                                                                               |                      |
| 1429.0           | 10             | 1.32        | $2 \times \nu_{3S} + \nu_{6S}$                       | 1431.5                     | 2.4          |                                                                               |                      |
|                  |                |             | $4 \times \nu_{1S} + \nu_{3S}$                       | 1430.9                     | 1.9          |                                                                               |                      |
| 1431.8           | 3              | 0.92        | $\nu_{6S} + 2 \times \nu_{5A}$                       | 1433.7                     | 1.9          |                                                                               |                      |
|                  |                |             | $2 \times \nu_{1S} + \nu_{5S} + 2 \times \nu_{3A}$   | 1428.5                     | -3.2         |                                                                               |                      |
| 1433.7           | 19             | 1.90        | $\nu_{6S} + \nu_{8S}$                                | 1435.5                     | 1.8          |                                                                               |                      |
| 1438.1           | 5              | 1.15        |                                                      |                            |              |                                                                               |                      |
| 1440.5           | 4              | 1.49        |                                                      |                            |              |                                                                               |                      |
| 1442.3           | 6              | 1.88        | $\nu_{1S} + 2 \times \nu_{6S}$                       | 1442.3                     | -0.0         |                                                                               |                      |
| 1452.7           | 10             | 1.67        | $2 \times \nu_{1S} + \nu_{2S} + \nu_{6S}$            | 1455.3                     | 2.6          |                                                                               |                      |
| 1459.3           | 21             | 2.02        | $3 \times \nu_{1S} + 2 \times \nu_{2S}$              | 1468.3                     | 9.0          |                                                                               |                      |
| 1467.6           | 4              | 1.22        | $\nu_{1S} + 2 \times \nu_{3A} + 2 \times \nu_{3S}$   | 1469.4                     | 1.8          |                                                                               |                      |
|                  |                |             | $2 \times \nu_{1S} + \nu_{3S} + \nu_{5S}$            | 1467.5                     | -0.0         |                                                                               |                      |
| 1470.9           | 1              | 0.89        | $\nu_{1S} + 2 \times \nu_{3A} + 2 \times \nu_{5A}$   | 1471.6                     | 0.8          |                                                                               |                      |
| 1473.4           | 6              | 1.76        | $\nu_{1S} + 2 \times \nu_{3A} + \nu_{8S}$            | 1473.5                     | 0.0          |                                                                               |                      |
| 1475.5           | 8              | 1.49        | $3 \times \nu_{1S} + \nu_{7S}$                       | 1472.4                     | -3.1         |                                                                               |                      |
| 1478.4           | 3              | 1.00        | $2 \times \nu_{1S} + 2 \times \nu_{3A} + \nu_{6S}$   | 1480.2                     | 1.8          |                                                                               |                      |
| 1483.3           | 5              | 1.29        | $\nu_{1S} + \nu_{15S}$                               | 1483.0                     | -0.3         |                                                                               |                      |
| 1485.3           | 10             | 1.83        | $\nu_{3S} + \nu_{2S} + \nu_{7S}$                     | 1486.0                     | 0.7          |                                                                               |                      |
| 1488.6           | 2              | 1.64        |                                                      |                            |              |                                                                               |                      |
| 1493.5           | 3              | 1.45        |                                                      |                            |              |                                                                               |                      |
| 1495.8           | 6              | 1.74        |                                                      |                            |              |                                                                               |                      |
| 1499.3           | 2              | 1.55        |                                                      |                            |              |                                                                               |                      |
| 1502.8           | 5              | 1.91        | $\nu_{1S} + 3 \times \nu_{3S}$                       | 1508.4                     | 5.6          |                                                                               |                      |
| 1509.8           | 17             | 1.75        | $\nu_{1S} + \nu_{3S} + 2 \times \nu_{5A}$            | 1510.7                     | 0.9          |                                                                               |                      |
|                  |                |             | $\nu_{1S} + \nu_{7S} + \nu_{5S}$                     | 1509.1                     | -0.7         |                                                                               |                      |
| 1512.7           | 17             | 1.35        | $\nu_{1S} + \nu_{3S} + \nu_{8S}$                     | 1512.5                     | -0.2         |                                                                               |                      |
|                  |                |             | $\nu_{1S} + \nu_{7S} + \nu_{5S}$                     | 1509.1                     | -3.6         |                                                                               |                      |
| 1517.6           | 7              | 1.28        | $2 \times \nu_{1S} + \nu_{3S} + \nu_{6S}$            | 1519.3                     | 1.7          |                                                                               |                      |
| 1527.4           | 3              | 1.63        | $3 \times \nu_{1S} + \nu_{3S} + \nu_{2S}$            | 1532.3                     | 4.8          |                                                                               |                      |
|                  |                |             | $6 \times \nu_{1S}$                                  | 1518.7                     | -8.7         |                                                                               |                      |
| 1529.7           | 3              | 1.42        |                                                      |                            |              |                                                                               |                      |
| 1531.9           | 18             | 2.61        | $\nu_{1S} + \nu_{2S} + \nu_{3S} + \nu_{4S}$          | 1527.7                     | -4.2         |                                                                               |                      |
|                  |                |             | $\nu_{3S} + \nu_{11S}$                               | 1537.3                     | 5.2          |                                                                               |                      |
|                  |                |             | $3 \times \nu_{1S} + \nu_{2S} + \nu_{3S}$            | 1532.2                     | 0.3          |                                                                               |                      |
| 1542.0           | 3              | 1.56        |                                                      |                            |              |                                                                               |                      |
| 1547.6           | 12             | 2.01        | $2 \times \nu_{3S} + \nu_{7S}$                       | 1550.0                     | 2.3          |                                                                               |                      |
| 1552.2           | 7              | 1.22        | $\nu_{7S} + 2 \times \nu_{5A}$                       | 1552.2                     | -0.0         |                                                                               |                      |
| 1554.2           | 5              | 1.15        | $\nu_{7S} + \nu_{8S}$                                | 1554.0                     | -0.2         |                                                                               |                      |
| 1557.6           | 2              | 1.37        | $\nu_{1S} + \nu_{6S} + \nu_{7S}$                     | 1560.8                     | 3.1          |                                                                               |                      |

In column 6:  $\Delta \nu = \Sigma \nu_{\text{fund}} - \Delta \nu_{\text{osc}}$

**bold** – fundamental frequencies or overtones  $\nu_0^2$  of out-of-plane vibrations,

*italic* – comments to the assignment

(\*) – indicates discrepancies between the assignment of Wu et al.[8] and the assignment proposed in this work
